# Supplementary material for: Laminin-binding integrins are essential for the maintenance of functional mammary secretory epithelium in lactation
Source: Oxford University Press journal article supplement (doi:10.1242/dev.181552), 2020-01-01
Supplement: dev181552supp.pdf [file dev181552supp.pdf]

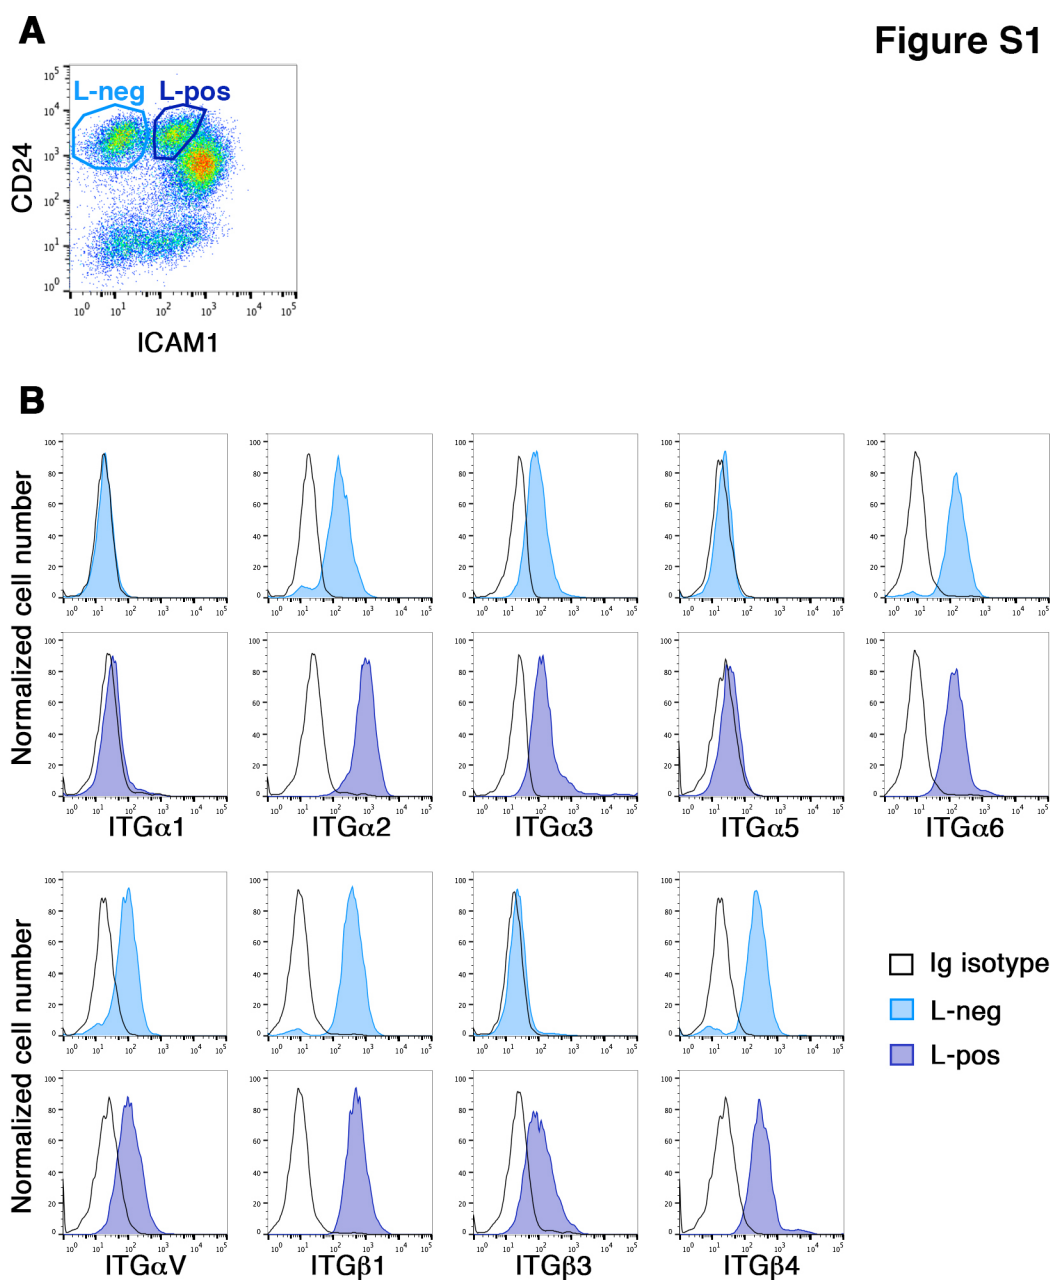

**Figure S1. Analysis of integrin expression in freshly sorted mammary luminal cells from 16-week-old virgin mice. Related to Figure 1.**

(A) Dot plot showing separation of luminal cell populations by flow cytometry on the basis of CD24 and ICAM1 expression. L-Neg: Luminal ICAM-negative population; L-pos: Luminal ICAM-positive (clonogenic) population.

(B) Flow cytometry analysis of integrin expression in L-Neg and L-pos cells separated as shown in (A).

Figure S2

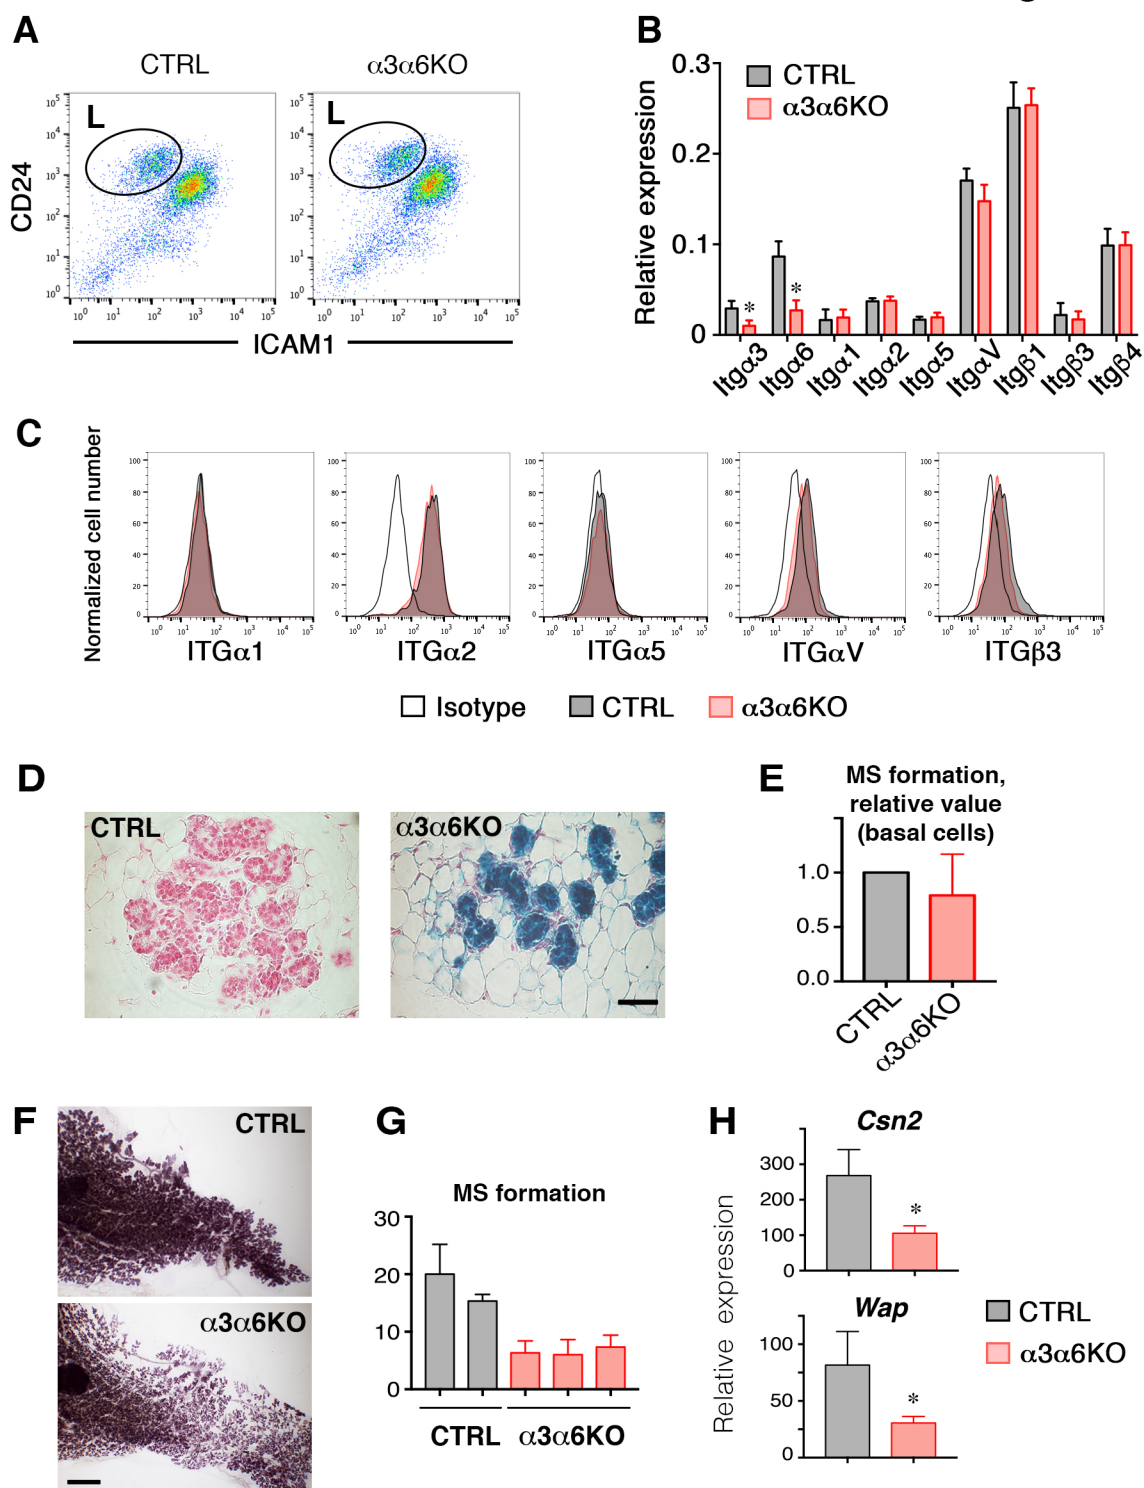

**Figure S2. Analysis of integrin expression in mammary luminal cells isolated from 15-day-pregnant mice.** Related to Figure 1.

(A) Dot plot showing separation of basal and luminal cells from 15-day-pregnant mammary glands by flow cytometry. L: luminal cells.

(B) RT-qPCR analysis of integrin gene expression in freshly isolated luminal cells sorted from 15-day-pregnant mammary glands as illustrated in A. The values were normalized to *Gapdh* and presented as means±SD from three independent experiments.  $p = 0.05$  for *Itga3* and  $0.03$  for *Itga6*.

(C) Flow cytometry analysis of integrin expression in mammary luminal cells from control and  $\alpha3\alpha6$ KO females.

(D) Sections through 15-day-pregnant control and  $\alpha3\alpha6$ KO mouse mammary glands. X-gal staining. Bar,  $40\ \mu\text{m}$ .

(E) Mammosphere formation by basal cells sorted from 15-day-pregnant mouse mammary glands. The values shown are means±SD obtained in 3 independent experiments.

(F) 18-day-pregnant control and  $\alpha3\alpha6$ KO mammary glands stained with Carmine in whole-mount (bar, 2 mm).

(G) Mammosphere formation by luminal cells sorted from 18-day-pregnant mouse mammary glands. The values shown are means±SD of mammospheres obtained in 3 well replicates obtained with 10000 cells from two control and three  $\alpha3\alpha6$ KO females.

(H) RT-qPCR analysis of milk protein gene expression in freshly sorted luminal cells from 18-day-pregnant mouse mammary glands. The values shown are means±SD obtained from 4 control and 4  $\alpha3\alpha6$ KO females. \*  $p = 0.024$  for *Csn2* and  $0.048$  for *Wap*.

Figure S3

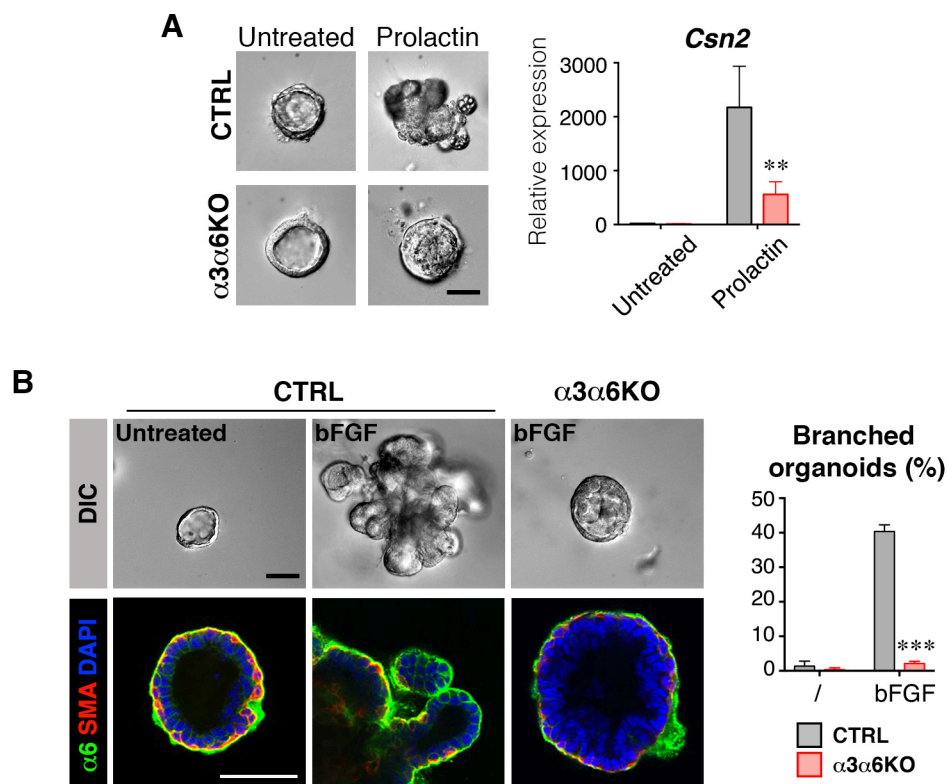

**Figure S3. Analysis of mammary organoids obtained from 15-day-pregnant mammary glands.** Related to Figure 1.

(A) Left: DIC images of mammary organoids after 10 days of culture in the presence or absence of prolactin. Bar, 30  $\mu\text{m}$ . Right: RT-qPCR analysis of *Csn2* gene expression in mammary organoids cultured for 8-12 days in the presence or absence of prolactin. Means+SD from 4 independent experiments are shown.  $p = 0.007$ .

(B) Mammary organoids after 5 days of culture in the presence or absence of bFGF. Upper panels, representative contrast microscopy (DIC) images. Lower panels, immunofluorescence labeling with antibodies against  $\alpha 6$  integrin and anti  $\alpha$ -SMA, confocal microscopy. DAPI served to visualize nuclei. Bar, 30  $\mu\text{m}$  in upper panels and 50  $\mu\text{m}$  in lower panels. The graph represents the percentage of branched organoids (i.e., with 3 branches at least). Means+SD from three independent experiments are shown.  $p = 0.000005$ .

Figure S4

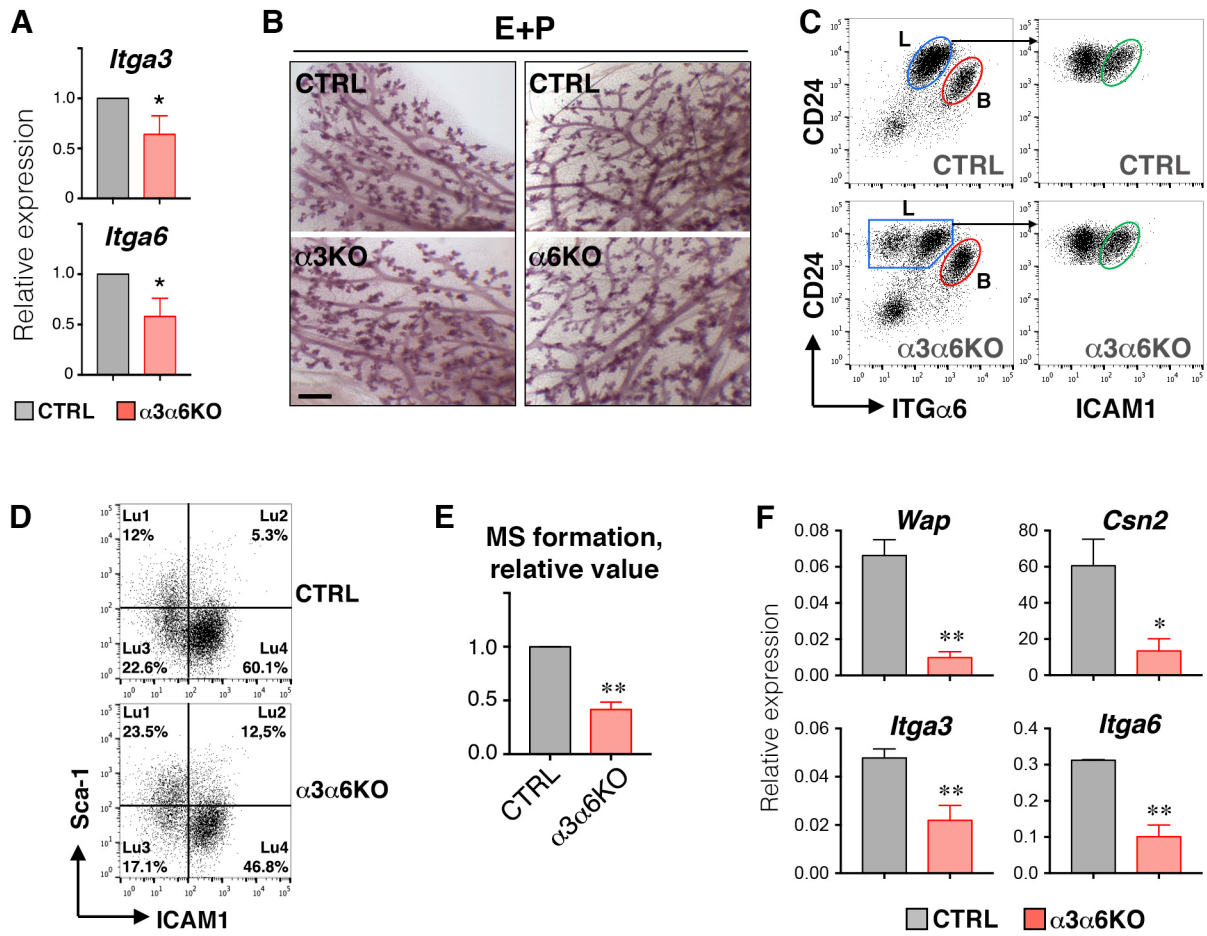

**Figure S4. Effect of E/P stimulation on mammary glands.** Related to Figure 2.

(A) RT-qPCR analysis of integrin gene expression in luminal cells sorted from mammary glands stimulated with E/P. The values were normalized to *Gapdh* and presented as means+SD from four independent experiments.  $p = 0.03$  for *Itga3* and  $0.02$  for *Itga6*.

(B) Fragments of mammary glands from E/P-stimulated  $\alpha3$ KO and  $\alpha6$ KO and their respective control littermates stained with Carmine in whole-mounts. Bar,  $400 \mu\text{m}$ .

(C) Dot plot showing flow cytometry separation of mammary epithelial cells from E/P stimulated mammary glands. Left panels, separation of basal and luminal cells. Right: Luminal cells were plotted for ICAM1 expression, and the ICAM1+ progenitor population (green circle) selected for further analyses (see Figure 2).

(D) Dot plot showing flow cytometry separation of mammary luminal cells from E/P stimulated mammary glands on the bases of their ICAM1 and Sca-1 expression. The cell percentage of each of the four populations (Lu1 to Lu4) is indicated. A representative experiment is shown.

(E) Mammosphere formation by Lu4 cells sorted from E/P stimulated mammary glands. The values shown are means $\pm$ SD obtained in 3 independent experiments.  $p = 0.005$ .

(F) RT-qPCR analysis of milk protein and integrin gene expression in freshly sorted Lu4 cells from E/P stimulated mammary glands. The values shown are means $\pm$ SD obtained from 3 control and 3  $\alpha3\alpha6$ KO females. \*  $p = 0.004$  for *Wap*;  $0.017$  for *Csn2*;  $0.006$  for *Itga3*;  $0.007$  for *Itga6*.

Figure S5

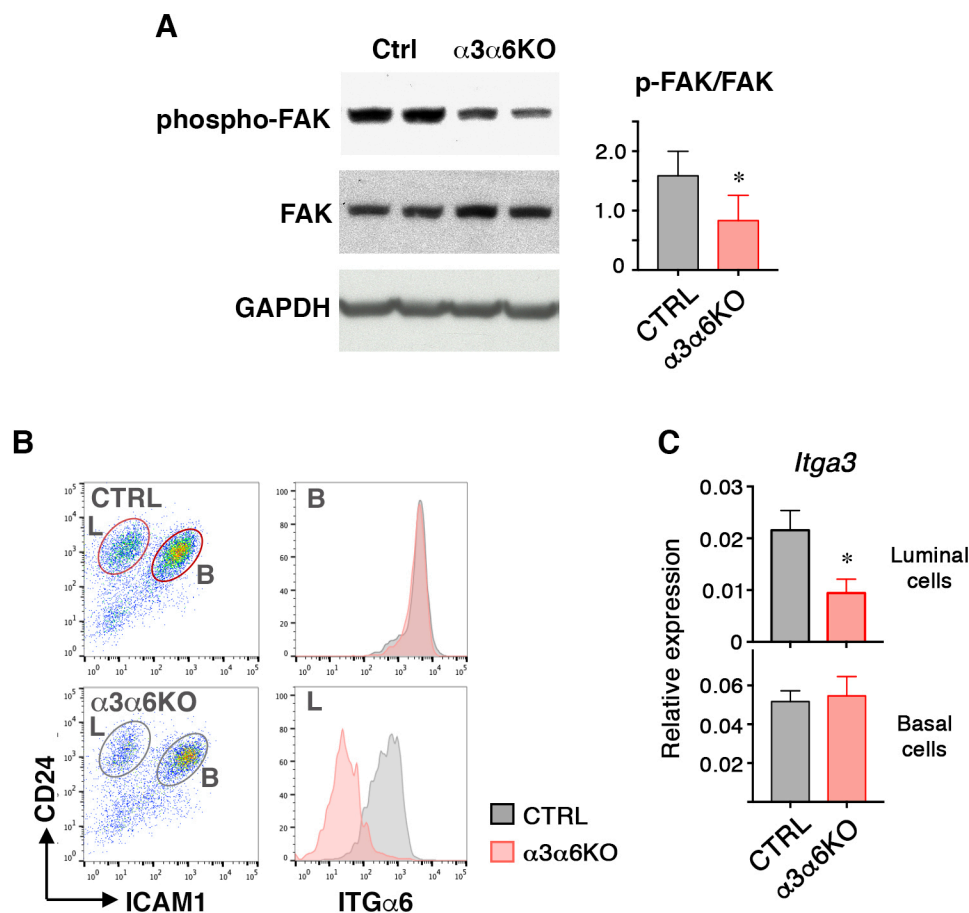

**Figure S5. Analysis of integrin expression in 2-day-lactating mammary glands.** Related to Figure 3.

(A) Western blotting analysis of phospho-FAK and FAK on protein extracts of 2-day-lactating mammary glands of control and  $\alpha3\alpha6$ KO mice. GAPDH was used as a loading control. The graph shows the means $\pm$ SEM from 4 animals per genotype.  $p = 0.04$ .

(B) Left: Dot plot showing separation of basal (B) and luminal (L) cells from 2-day-lactating mammary glands on the basis of their CD24 and ICAM1 expression. Right: Basal and luminal cells were plotted for  $\alpha6$  integrin expression. Most of the luminal cells lack  $\alpha6$  integrin expression in  $\alpha3\alpha6$ KO glands.

(C) RT-qPCR analysis of *Itga3* expression in freshly isolated luminal and basal cells sorted from 2-day-lactating mammary glands as illustrated in B. The values were normalized to *Gapdh* and presented as means $\pm$ SD from three independent experiments.  $p = 0.013$ .

Figure S6

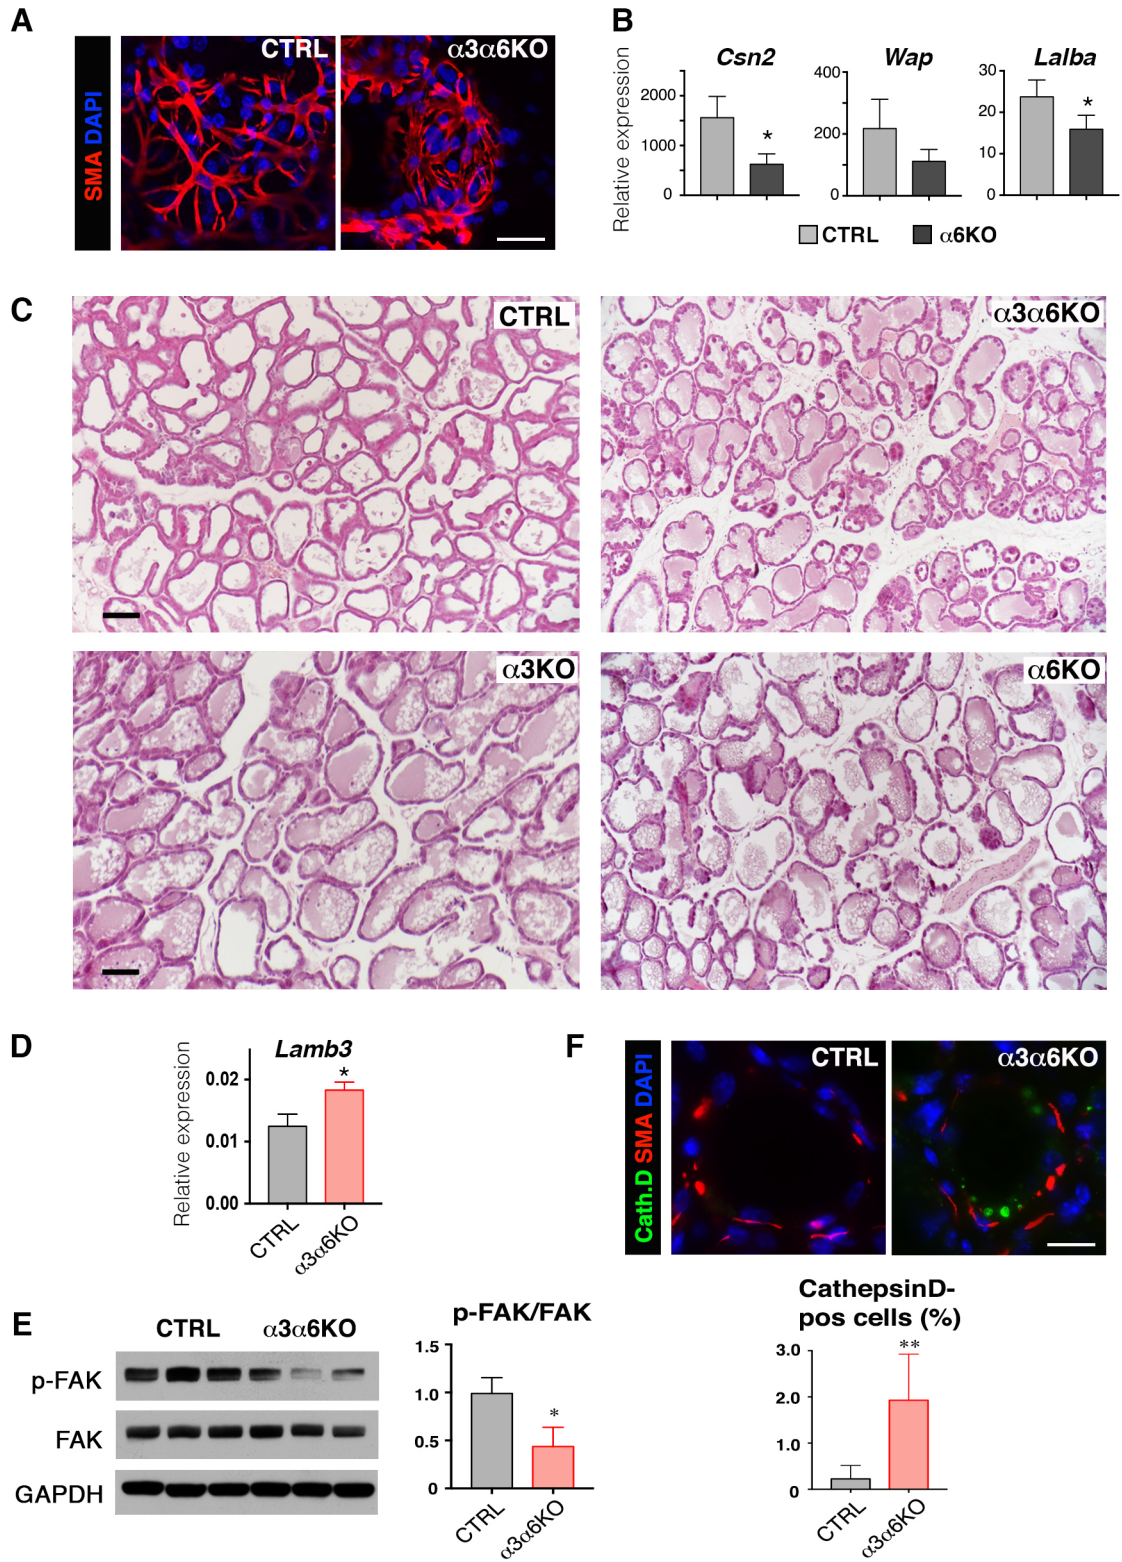



**Figure S6. The deletion of LN-binding integrins from mammary luminal progenitors leads to unscheduled gland involution.** Related to Figure 4.

(A) Immunofluorescence labeling of sections through 21-day-lactating mouse mammary glands with an antibody against  $\alpha$ -SMA. DAPI served to visualize nuclei. Bar, 25  $\mu$ m.

(B) RT-qPCR analysis of milk protein gene expression in 21-day-lactating mouse mammary glands of control and  $\alpha$ 6KO females. The graph shows means $\pm$ SD; 4 females per genotype were analyzed;  $p = 0.015$  for *Csn2*; 0.1 for *Wap*; 0.026 for *Lalba*.

(C) H&E-stained sections through 14-day-lactating mouse mammary glands. Bar, upper panels, 120  $\mu$ m; lower panels, 70  $\mu$ m.

(D) RT-qPCR analysis of *Lamb3* gene expression in 14-day-lactating mouse mammary glands of control and  $\alpha$ 3 $\alpha$ 6KO females. The graph shows means $\pm$ SD; 3 females per genotype were analyzed;  $p = 0.018$ .

(E) Western blotting analysis of phospho-FAK and FAK on protein extracts of 2-day-lactating mammary glands of control and  $\alpha$ 3 $\alpha$ 6KO mice.  $\beta$ -actin was used as a loading control. The graph shows the means $\pm$ SEM from 3 animals per genotype.  $p = 0.02$ .

(F) Immunofluorescence labeling of sections through 21-day-lactating mouse mammary glands with antibodies against cathepsin D and  $\alpha$ -SMA. DAPI served to visualize nuclei. Bar, 18  $\mu$ m. The graph shows the means $\pm$ SD from five microphotographs taken from two control and two  $\alpha$ 3 $\alpha$ 6KO glands.  $p = 0.004$ .

Figure S7

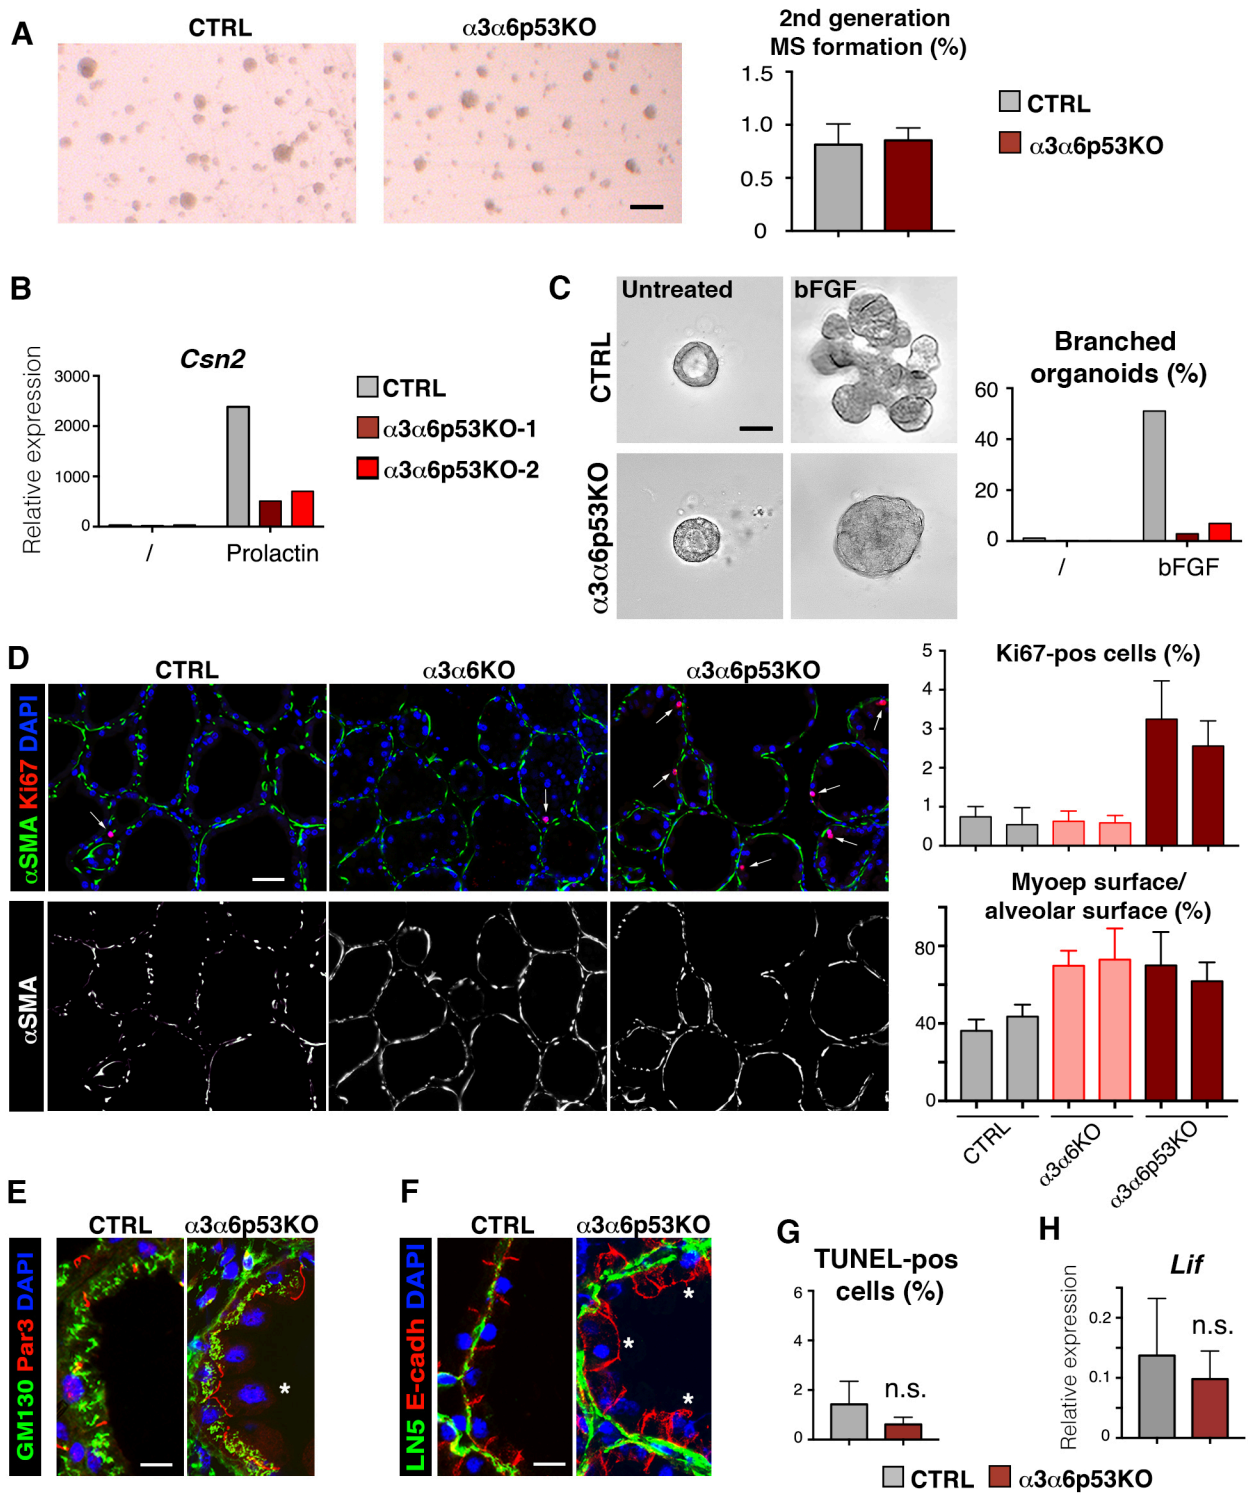

**Figure S7. Genetic p53 suppression restores growth but not differentiation in mammary luminal cells depleted of LN-binding integrins.** Related to Figure 5.

(A) Mammosphere formation by luminal ICAM1<sup>+</sup> cells sorted from E/P stimulated mammary glands. Left: representative microphotographs (bar, 400  $\mu$ m). The values shown in the graph are means $\pm$ SD obtained in 3 separated wells of a representative experiment.

(B) RT-qPCR analysis of *Csn2* gene expression in mammary organoids cultured for 8-10 days in the presence or absence of prolactin. The values obtained from one control and two  $\alpha$ 3 $\alpha$ 6p53KO 15-day-pregnant glands are shown.

(C) Mammary organoids after 5 days of culture in the presence or absence of bFGF. Left, representative contrast microscopy (DIC) images. Bar, 30  $\mu$ m. The graph represents the percentage of branched organoids (i.e., with 3 branches at least). The values obtained from one control and two  $\alpha$ 3 $\alpha$ 6p53KO 15-day-pregnant glands are shown.

(D) Immunofluorescence staining of control,  $\alpha$ 3 $\alpha$ 6KO and  $\alpha$ 3 $\alpha$ 6p53KO mouse mammary gland sections with antibodies against Ki67 and  $\alpha$ SMA. The upper graph shows quantification of Ki67 positive cells. The lower graph shows the percentage of the alveolar surface covered by basal SMA<sup>+</sup> cells. Graphs show means $\pm$ SD obtained from 6 microphotographs; 2 animals per genotype were analyzed.

(E), (F) Immunofluorescence labeling of sections through 14-day-lactating mouse mammary gland with antibodies against GM130 and Par3 (F) and antibodies against the Laminin-5 and E-cadherin. DAPI served to visualize nuclei. Asterisks mark cells with aberrant Par3 and E-cadherin localization. Bar, 15  $\mu$ m.

(G) TUNEL assay performed with the sections through 21-day-lactating mouse mammary glands from control and  $\alpha$ 3 $\alpha$ 6p53KO females. The graph shows means $\pm$ SD; 4 females per genotype were analyzed; n.s., non significant.

(H) RT-qPCR analysis of *Lif* expression in 21-day-lactating mammary glands from control and  $\alpha$ 3 $\alpha$ 6p53KO females. The graph shows means $\pm$ SD; 4 females per genotype were analyzed; n.s., non significant.

Figure S8

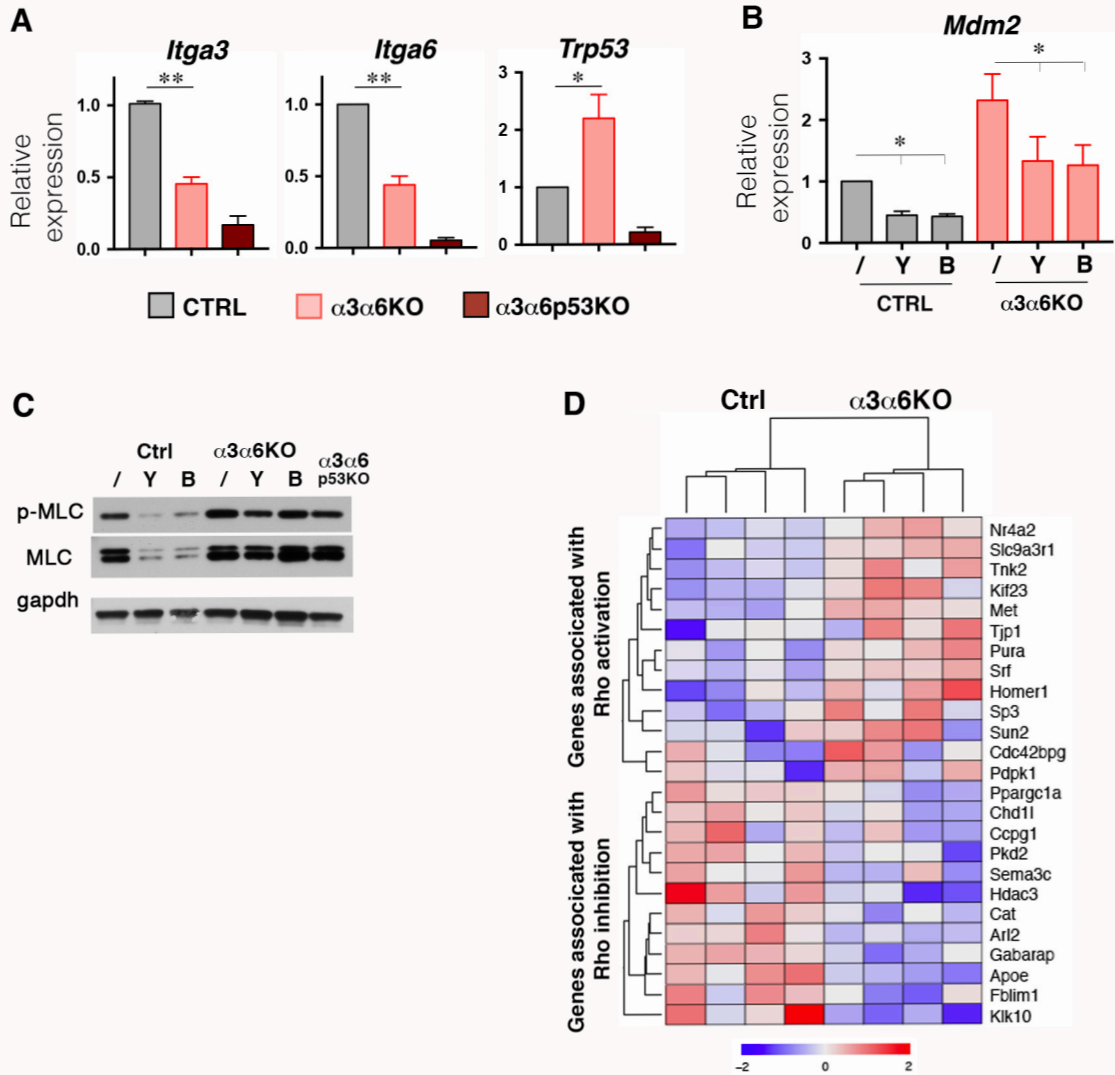

**Figure S8. Activation of a Rho/MyosinII/p53 pathway downstream depletion of LN-binding integrins in mammary luminal progenitors.** Related to Figure 6.

(A) RT-qPCR analysis of *Itga3*, *Itga6* and *Trp53* gene expression in cells obtained from mammospheres formed by control,  $\alpha3\alpha6$ KO and  $\alpha3\alpha6p53$ KO luminal progenitor cells. The graph shows means $\pm$ SD obtained in three independent experiments.  $p = 0.0001$  for *Itga3*;  $0.0004$  for *Itga6*;  $0.01$  for *Trp53*.

(B) RT-qPCR analysis of *Mdm2* gene expression in cells obtained from mammospheres formed by luminal progenitor cells in the presence of Y27632 or Blebbistatin. The graph shows means $\pm$ SD obtained in three independent experiments. For control mammospheres,  $p = 0.005$  for Y27632-treated cells compared to non-treated cells,  $p = 0.02$  for Blebbistatin-treated cells compared to non-treated cells. For  $\alpha3\alpha6$ KO mammospheres,  $p = 0.015$  for Y27632-treated cells compared to non-treated cells,  $p = 0.009$  for Blebbistatin-treated cells compared to non-treated cells.

(C) Western blotting analysis Phospho-MLC and MLC- protein levels in extracts of mammosphere formed by control,  $\alpha3\alpha6$ KO and  $\alpha3\alpha6p53$ KO luminal cells. GAPDH was used as a loading control. A representative experiment is shown.

(D) Heatmap based on Affymetrix analysis of freshly sorted luminal cells from 15-day-pregnant mammary glands from control and  $\alpha3\alpha6$ KO females.

In (A) and (B), values obtained for control cells were set as 1 in each experiment. Through the whole figure: Y, Y27632, B, Blebbistatin.

**Table S1: REACTOME pathway analysis on genes differentially expressed in  $\alpha 3\alpha 6$ KO luminal cells compared to Ctrl luminal cells (p15-pregnant mice). Related to Figure 3.**

| Pathway Description (REACTOME)                           | Nb Genes in Pathway | Nb Regulated Genes (Up / Down) | P-Value (Up) | P-Value (Down) |
|----------------------------------------------------------|---------------------|--------------------------------|--------------|----------------|
| Bmal1 : Clock, NPas2 activates circadian gene expression | 21                  | 4 (0/4)                        | NA           | 1,09E-03       |
| Rora activates gene expression                           | 11                  | 3 (0/3)                        | NA           | 5,02E-03       |
| RHO GTPases Activate Formins                             | 111                 | 8 (6/2)                        | 1,15E-02     | NA             |
| SUMOylation of transcription factors                     | 11                  | 3 (2/1)                        | NA           | NA             |
| Nr1d1 (Rev-erba) represses gene expression               | 3                   | 2 (0/2)                        | NA           | 2,94E-02       |
| Transcriptional activation of mitochondrial biogenesis   | 14                  | 3 (2/1)                        | NA           | NA             |
| Iron uptake and transport                                | 15                  | 3 (1/2)                        | NA           | NA             |

**Table S2: Antibodies used for FACs analysis of integrin expression**

| <b>Antibody</b>        | <b>Isotype</b>       | <b>Company, Reference</b> | <b>Clone</b>            |
|------------------------|----------------------|---------------------------|-------------------------|
| ITG $\alpha$ 1 (CD49a) | Armenian hamster IgG | Biolegend, 142603         | HM $\alpha$ 1           |
| ITG $\alpha$ 2 (CD49b) | Armenian hamster IgG | Biolegend, 103506         | HM $\alpha$ 2           |
| ITG $\alpha$ 3 (CD49c) | Goat polyclonal IgG  | R&D Systems, AF2787       |                         |
| ITG $\alpha$ 5 (CD49e) | Rat IgG2a,k          | Biolegend, 103805         | 5H10-27 (MFR5)          |
| ITG $\alpha$ 6 (CD49f) | Rat IgG2a,k          | Biolegend, 313622         | GoH3                    |
| ITG $\alpha$ V (CD51)  | Rat IgG1,k           | Biolegend, 104105         | RMV-7                   |
| ITG $\beta$ 1 (CD29)   | Armenian hamster IgG | Biolegend, 102221         | HM $\beta$ 1-1          |
| ITG $\beta$ 3 (CD61)   | Armenian hamster IgG | Biolegend, 104307         | 2C9.G2 (HM $\beta$ 3-1) |
| ITG $\beta$ 4 (CD104)  | Rat IgG2a,k          | Biolegend, 123609         | 346-11A                 |

**Table S3: Primers used for RT-qPCR analysis**

|           |                                   |
|-----------|-----------------------------------|
| Cdkn1a-s  | 5' – TTCCGCACAGGAGCAAAGTG - 3'    |
| Cdkn1a-as | 5' - CCGTGACGAAGTCAAAGTTC - 3'    |
| Csn2-s    | 5' - CCTCTGAGACTGATAGTATTT - 3'   |
| Csn2-as   | 5' - TGGATGCTGGAGTGAAC TT TA - 3' |
| Elf5-s    | 5' - CCAACGCATCCTTCTGTGAC - 3'    |
| Elf5-as   | 5' - AGGCAGGGTAGTAGTCTTCA - 3'    |
| Gapdh-s   | 5' - CCAATGTGTCCGTCGTGGATC - 3'   |
| Gapdh -as | 5' - GTTGAAGTCGCAGGAGACAAC - 3'   |
| Itga3-s   | 5' - CACGCACATCATCACTGTTG - 3'    |
| Itga3-as  | 5' - CTGCCACCCATCATTGTTCA - 3'    |
| Lalba-s   | 5' - GACAACGGCAGCACAGAGTA - 3'    |
| Lalba-as  | 5' - GCCACAGATGTTCTCCGAC - 3'     |
| Mdm2-s    | 5' – CGCAAAACGACACTTACACTA - 3'   |
| Mdm2-as   | 5' - GCTCCTTCACAGAGAAACTC - 3'    |
| Wap-s     | 5' - TTGAGGGCACAGAGTGTATC- 3'     |
| Wap-as    | 5' - TTTGCGGGTCCTACCACAG- 3'      |

Other primers were purchased from SABiosciences/Qiagen.
